# Supplementary material for: Methylation of FAM110C is a synthetic lethal marker for ATR/CHK1 inhibitors in pancreatic cancer
Source: PubMed Central journal article supplement (PMC11284899; doi:10.2478/jtim-2023-0128), 2024-07-27
Supplement: jtim-2023-0128_sm.pdf [file jtim-2023-0128_sm.pdf]

## Supplementary Materials

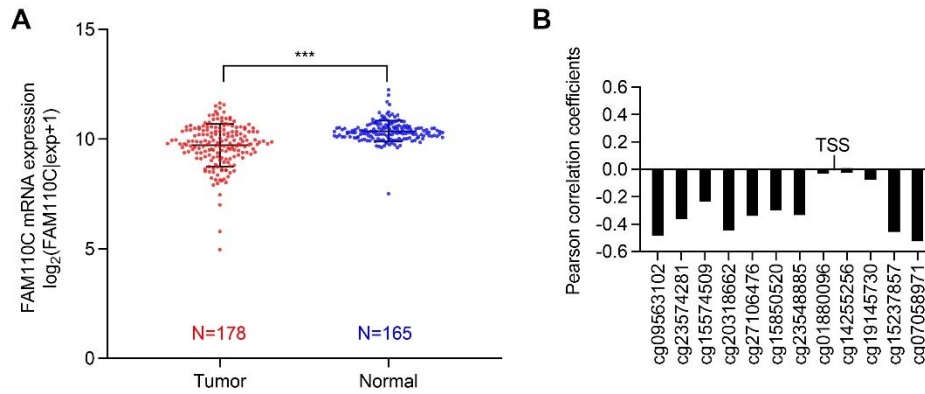

**Supplementary figure 1 The expression and methylation status of *FAM110C* in TCGA and GTEx database.** (A) The expression levels of *FAM110C* in pancreatic cancer tissue and normal tissue samples. \*\*\* $P < 0.001$ . (B) The relationship between *FAM110C* expression and methylation at CpG sites in the promoter region in 178 cases of pancreatic cancer samples.

**Supplementary table 1 The list of primer sequences.**

| Primer Names                 | Primer Sequences                                                                                                                                                     |
|------------------------------|----------------------------------------------------------------------------------------------------------------------------------------------------------------------|
| <i>FAM110C</i> RT-PCR primer | 5'-ACTGTGTGACCCTCAAGGTGC-3'(F)<br>5'-TCATCGGGAAGGTTTGCTTCCTC-3'(R)                                                                                                   |
| <i>GAPDH</i> RT-PCR primer   | 5'-GACCACAGTCCA TGCCATCAC -3'(F)<br>5'-GTCCACCACCCTGTTGCTGTA-3' (R)                                                                                                  |
| <i>FAM110C</i> -MSP primer   | 5'- GATGCGCGTTTTGGCGGTTTTGAGC -3' (MF)<br>5'- CCTCTCCACTACGCTCCTACGCG -3'(MR)<br>5'- GAAGATGTGTGTTTTGGTGGTTTTGAGT -3' (UF)<br>5'- CAACCTCTCCACTACACTCCTACACA -3'(UR) |
| <i>FAM110C</i> -BSSQ primer  | 5'- GAATYGGTTTTGGGATTGATTGG -3'(F)<br>5-TCCCCRAACACTTAATCRCCC-3'(R)                                                                                                  |
| <i>FAM110C</i> -CDS primer   | 5'- GCTCTAGAATGCGCGCCCTGGCGGCCCTGA-3'(F)<br>5'- CGGGATCCTCATCGGGAAGGTTTGCTTCCTCGGG -3'(R)                                                                            |
| sgRNA1                       | 5'-CACCGCGGATCGCGCCAAGTATGTG -3'(F)<br>5'-AAACCACATACTTGGCGCGATCCGC-3'(R)                                                                                            |
| sgRNA2                       | 5'-CACCGATGCGAATTCGTGCGAGGAT -3'(F)<br>5'-AAACATCCTCGCACGAATTCGCATC-3'(R)                                                                                            |

F: forward; R: reverse; MF: methylated forward primer; MR: methylated reverse primer; UF: unmethylated forward primer; UR: unmethylated reverse primer.

**Supplementary table 2 The list of antibodies.**

| Gene name                                | Manufacturer      | Cat No.    | Antigenicity | Usage                    |
|------------------------------------------|-------------------|------------|--------------|--------------------------|
| <i>FAM110C</i>                           | Novus Biologicals | NBP2-84878 | Rabbit       | IP 2 $\mu$ g<br>WB 1:500 |
| <i>FAM110C</i>                           | Invitrogen        | PA5-57542  | Rabbit       | IHC 1:500                |
| <i>HMGB1</i>                             | Proteintech       | HX15100    | Rabbit       | IP 5 $\mu$ g             |
| <i>cyclinE1</i>                          | Proteintech       | 11554-1-AP | Rabbit       | WB 1:1000                |
| <i>cyclinA2</i>                          | Proteintech       | 18202-1-AP | Rabbit       | WB 1:10000               |
| <i>cyclinD1</i>                          | Proteintech       | 60186-1-Ig | Mouse        | WB 1:10000               |
| <i>CDK2</i>                              | Proteintech       | 10122-1-AP | Rabbit       | WB 1:10000               |
| <i>MMP2</i>                              | Proteintech       | 66366-1-Ig | Mouse        | WB 1:1000<br>IHC 1:300   |
| <i>MMP7</i>                              | ZENBIO            | 820096     | Rabbit       | WB 1:500<br>IHC 1:300    |
| <i>MMP9</i>                              | Proteintech       | 10375-2-AP | Rabbit       | WB 1:1000<br>IHC 1:300   |
| <i>Caspase3</i>                          | Proteintech       | 19677-1-AP | Rabbit       | WB 1:500                 |
| <i>Cleaved-caspase3</i>                  | Proteintech       | 19677-1-AP | Rabbit       | WB 1:500                 |
| <i>Bcl-2</i>                             | Proteintech       | 12789-1-AP | Rabbit       | WB 1:2000                |
| <i>Bax</i>                               | Proteintech       | 50599-2-Ig | Rabbit       | WB 1:2000                |
| <i>ATM</i>                               | huaxingbio        | HX12561    | Rabbit       | WB 1:1000                |
| <i>p-ATM(Ser1981)</i>                    | huaxingbio        | HX8919     | Rabbit       | WB 1:1000                |
| <i>CHK2</i>                              | ZENBIO            | R23921     | Rabbit       | WB 1:1000                |
| <i>p-CHK2(Thr68)</i>                     | ZENBIO            | 340766     | Rabbit       | WB 1:1000                |
| <i>ATR</i>                               | Cell signaling    | 2790S      | Rabbit       | WB 1:1000                |
| <i>p-ATR(Ser428)</i>                     | Cell signaling    | 2853S      | Rabbit       | WB 1:1000                |
| <i>CHK1</i>                              | ZENBIO            | 380200     | Rabbit       | WB 1:1000                |
| <i>p-CHK1(Ser345)</i>                    | Gentex            | GTX100065  | Rabbit       | WB 1:1000                |
| <i>DNA PKcs</i>                          | ZENBIO            | 200618-6D1 | Mouse        | WB 1:1000                |
| <i>p-DNA PKcs (Ser2056)</i>              | ZENBIO            | 380800     | Rabbit       | WB 1:1000                |
| <i>XRCC4</i>                             | huaxingbio        | HX19688    | Mouse        | WB 1:1000                |
| <i><math>\gamma</math>-H2AX (Ser139)</i> | Cell Signaling    | 9718       | Rabbit       | WB 1:1000                |
| <i><math>\beta</math>-actin</i>          | Proteintech       | 66009-1-Ig | Mouse        | WB 1:50000               |

---

**Supplementary table 3 The siRNA sequences for *HMGB1*.**

| Primer Names | Primer Sequences                |
|--------------|---------------------------------|
| Scramble     | 5'-UUCUCCGAACGUGUCACGUTT -3'(F) |
|              | 5'-ACGUGACACGUUCGGAGAATT-3'(R)  |
| siRNA#1      | 5'-GGGAGGAGCAUAAGAAGAATT -3'(F) |
|              | 5'-UUCUUCUUAUGCUCCUCCCTT-3'(R)  |
| siRNA#2      | 5'-GGACAAGGCCCGUUAUGAATT -3'(F) |
|              | 5'-UUCAUAACGGGCCUUGUCCTT-3'(R)  |
| siRNA#3      | 5'-CCUCUUCUGCUCUGAGUAUTT -3'(F) |
|              | 5'-AUACUCAGAGCAGAAGAGGTT-3'(R)  |

F: forward; R: reverse.

**Supplementary table 4 The list of proteins (score >3) from the extra band in FAM110C re-expressed MIAPaCa-2 cell.**

| Accession | Description                                                                                                          | Score        | related function / signal pathways                     |
|-----------|----------------------------------------------------------------------------------------------------------------------|--------------|--------------------------------------------------------|
| P27348    | 14-3-3 protein theta OS=Homo sapiens OX=9606 GN=YWHAQ PE=1 SV=1 - [1433T_HUMAN]                                      | 146.33       | apoptosis                                              |
| P63103    | 14-3-3 protein zeta/delta OS=Bos taurus OX=9913 GN=YWHAZ PE=1 SV=1 - [1433Z_BOVIN]                                   | 110.82       | apoptosis                                              |
| P31946-2  | Isoform Short of 14-3-3 protein beta/alpha OS=Homo sapiens OX=9606 GN=YWHAB - [1433B_HUMAN]                          | 85.55        | apoptosis                                              |
| P67936    | Tropomyosin alpha-4 chain OS=Homo sapiens OX=9606 GN=TPM4 PE=1 SV=3 - [TPM4_HUMAN]                                   | 55.10        | NF-κB, stress                                          |
| P06753-3  | Isoform 3 of Tropomyosin alpha-3 chain OS=Homo sapiens OX=9606 GN=TPM3 - [TPM3_HUMAN]                                | 38.88        | EMT                                                    |
| P07477    | Trypsin-1 OS=Homo sapiens OX=9606 GN=PRSS1 PE=1 SV=1 - [TRY1_HUMAN]                                                  | 37.74        | ERK, apoptosis                                         |
| P61981    | 14-3-3 protein gamma OS=Homo sapiens OX=9606 GN=YWHAG PE=1 SV=2 - [1433G_HUMAN]                                      | 34.86        | apoptosis                                              |
| P62701    | 40S ribosomal protein S4, X isoform OS=Homo sapiens OX=9606 GN=RPS4X PE=1 SV=2 - [RS4X_HUMAN]                        | 30.40        | MTOR, stress                                           |
| P09493-5  | Isoform 5 of Tropomyosin alpha-1 chain OS=Homo sapiens OX=9606 GN=TPM1 - [TPM1_HUMAN]                                | 27.18        | stress, cell fate, DNA damage repair                   |
| Q04917    | 14-3-3 protein eta OS=Homo sapiens OX=9606 GN=YWHAH PE=1 SV=4 - [1433F_HUMAN]                                        | 24.76        | apoptosis                                              |
| P09429    | <b>High mobility group protein B1 OS=Homo sapiens OX=9606 GN=HMGB1 PE=1 SV=3 - [HMGB1_HUMAN]</b>                     | <b>20.70</b> | <b>DNA damage repair, PI3K/AKT, JAK/STAT and NF-κB</b> |
| P09493-10 | Isoform 10 of Tropomyosin alpha-1 chain OS=Homo sapiens OX=9606 GN=TPM1 - [TPM1_HUMAN]                               | 16.59        | stress, cell fate, DNA damage repair                   |
| P31947-2  | Isoform 2 of 14-3-3 protein sigma OS=Homo sapiens OX=9606 GN=SFN - [1433S_HUMAN]                                     | 14.90        | apoptosis                                              |
| Q86YZ3    | Hornerin OS=Homo sapiens OX=9606 GN=HRNR PE=1 SV=2 - [HORN_HUMAN]                                                    | 14.59        | AKT, immune                                            |
| Q8NC51-4  | Isoform 4 of Plasminogen activator inhibitor 1 RNA-binding protein OS=Homo sapiens OX=9606 GN=SERBP1 - [PAIRB_HUMAN] | 10.91        | stress, apoptosis, metabolism                          |
| P35579-2  | Isoform 2 of Myosin-9 OS=Homo sapiens OX=9606 GN=MYH9 - [MYH9_HUMAN]                                                 | 10.06        | stress, β-catenin, NOTCH, PI3K/AKT                     |
| P0CG48    | Polyubiquitin-C OS=Homo sapiens OX=9606 GN=UBC PE=1 SV=3 - [UBC_HUMAN]                                               | 9.60         | stress, ubiquitin                                      |
| P18124    | 60S ribosomal protein L7 OS=Homo sapiens OX=9606 GN=RPL7 PE=1 SV=1 - [RL7_HUMAN]                                     | 9.55         | stress, ferroptosis                                    |
| P48507    | Glutamate--cysteine ligase regulatory subunit OS=Homo sapiens OX=9606 GN=GCLM PE=1 SV=1 - [GSH0_HUMAN]               | 9.39         | ferroptosis, metabolism, ERK/Nrf2, NF-κB/Nrf2          |
| P47756-2  | Isoform 2 of F-actin-capping protein subunit beta OS=Homo sapiens OX=9606 GN=CAPZB - [CAPZB_HUMAN]                   | 8.58         | cell fate                                              |
| P26373    | 60S ribosomal protein L13 OS=Homo sapiens OX=9606 GN=RPL13 PE=1 SV=4 - [RL13_HUMAN]                                  | 6.89         | NF-κB                                                  |
| Q9Y5M8    | Signal recognition particle receptor subunit beta OS=Homo sapiens OX=9606 GN=SRPRB PE=1 SV=3 - [SRPRB_HUMAN]         | 5.89         | NF-κB, stress                                          |
| O60762    | Dolichol-phosphate mannosyltransferase subunit 1 OS=Homo sapiens OX=9606 GN=DPM1 PE=1 SV=1 [DPM1_HUMAN]              | 4.91         | stress, metabolism                                     |
| P81605    | Dermcidin OS=Homo sapiens OX=9606 GN=DCD PE=1 SV=2 - [DCD_HUMAN]                                                     | 4.91         | stress, Wnt                                            |
| P35030-5  | Isoform 5 of Trypsin-3 OS=Homo sapiens OX=9606 GN=PRSS3 - [TRY3_HUMAN]                                               | 4.04         | MEK/ERK, chemoresistance                               |
| P62917    | 60S ribosomal protein L8 OS=Homo sapiens OX=9606 GN=RPL8 PE=1 SV=2 - [RL8_HUMAN]                                     | 3.96         | MTOR, ferroptosis                                      |
| P04424-2  | Isoform 2 of Argininosuccinate lyase OS=Homo sapiens OX=9606 GN=ASL - [ARLY_HUMAN]                                   | 3.79         | metabolism                                             |
| P05141    | ADP/ATP translocase 2 OS=Homo sapiens OX=9606 GN=SLC25A5 PE=1 SV=7 - [ADT2_HUMAN]                                    | 3.43         | PI3K/AKT, ERK, metabolism                              |
| P60660    | Myosin light polypeptide 6 OS=Homo sapiens OX=9606 GN=MYL6 PE=1 SV=2 - [MYL6_HUMAN]                                  | 3.34         | chemoresistant, cAMP Pathway                           |

**Supplementary table 5 The list of proteins (score >3) from the extra band in *FAM110C* re-expressed JF-305 cell.**

| Accession | Description                                                   | Score       | related function / signal pathways  |
|-----------|---------------------------------------------------------------|-------------|-------------------------------------|
| P159      |                                                               | 40.3        |                                     |
| 24        | Desmoplakin OS=Homo sapiens OX=9606 GN=DSP PE=1 SV=3          | 28          | p53, Wnt, EMT                       |
| P273      | 14-3-3 protein theta OS=Homo sapiens OX=9606 GN=YWHAQ         | 39.1        |                                     |
| 48        | PE=1 SV=1                                                     | 97          | apoptosis                           |
| P631      | 14-3-3 protein zeta/delta OS=Homo sapiens OX=9606             | 36.9        |                                     |
| 04        | GN=YWHAZ PE=1 SV=1                                            | 03          | apoptosis                           |
| P319      | 14-3-3 protein beta/alpha OS=Homo sapiens OX=9606             | 31.7        |                                     |
| 46        | GN=YWHAB PE=1 SV=3                                            | 32          | apoptosis                           |
| P149      | Junction plakoglobin OS=Homo sapiens OX=9606 GN=JUP           | 24.3        |                                     |
| 23        | PE=1 SV=3                                                     | 67          | EMT, PI3K/AKT                       |
| P619      | 14-3-3 protein gamma OS=Homo sapiens OX=9606                  | 24.2        |                                     |
| 81        | GN=YWHAG PE=1 SV=2                                            | 66          | apoptosis                           |
| P627      | 40S ribosomal protein S4, X isoform OS=Homo sapiens           | 22.1        |                                     |
| 01        | OX=9606 GN=RPS4X PE=1 SV=2                                    | 37          | MTOR, stress                        |
| P263      | 60S ribosomal protein L13 OS=Homo sapiens OX=9606             | 21.3        |                                     |
| 73        | GN=RPL13 PE=1 SV=4                                            | 04          | NF-κB                               |
| P067      | Alpha-enolase OS=Homo sapiens OX=9606 GN=ENO1 PE=1            | 20.5        |                                     |
| 33        | SV=2                                                          | 56          | DNA damage repair                   |
| P679      | Tropomyosin alpha-4 chain OS=Homo sapiens OX=9606             | 20.4        |                                     |
| 36        | GN=TPM4 PE=1 SV=3                                             | 9           | NF-κB, stress                       |
| Q024      | Desmoglein-1 OS=Homo sapiens OX=9606 GN=DSG1 PE=1             | 18.0        |                                     |
| 13        | SV=2                                                          | 12          | stress                              |
| P094      | Tropomyosin alpha-1 chain OS=Homo sapiens OX=9606             | 16.8        |                                     |
| 93        | GN=TPM1 PE=1 SV=2                                             | 22          | strss, cell fate, DNA damage repair |
| P233      | 40S ribosomal protein S3 OS=Homo sapiens OX=9606              | 16.2        |                                     |
| 96        | GN=RPS3 PE=1 SV=2                                             | 08          | NF-κB, DNA damage repair            |
| Q049      | 14-3-3 protein eta OS=Homo sapiens OX=9606 GN=YWHAH           | 14.9        |                                     |
| 17        | PE=1 SV=4                                                     | 95          | apoptosis                           |
| P146      | Pyruvate kinase PKM OS=Homo sapiens OX=9606 GN=PKM            | 13.6        |                                     |
| 18        | PE=1 SV=4                                                     | 89          | metabolism                          |
| P681      | Elongation factor 1-alpha 1 OS=Homo sapiens OX=9606           | 13.0        |                                     |
| 04        | GN=EEF1A1 PE=1 SV=1                                           | 49          | AKT, apoptosis                      |
| O607      | Dolichol-phosphate mannosyltransferase subunit 1 OS=Homo      | 12.9        |                                     |
| 62        | sapiens OX=9606 GN=DPM1 PE=1 SV=1                             | 02          | stress, cell fate                   |
| P186      | Phosphoglycerate mutase 1 OS=Homo sapiens OX=9606             | 12.6        |                                     |
| 69        | GN=PGAM1 PE=1 SV=2                                            | 85          | ferroptosis, NF-κB,metabolism       |
| P108      | 60 kDa heat shock protein, mitochondrial OS=Homo sapiens      | 11.9        |                                     |
| 09        | OX=9606 GN=HSPD1 PE=1 SV=2                                    | 87          | stress                              |
| P319      | 14-3-3 protein sigma OS=Homo sapiens OX=9606 GN=SFN           | 11.5        |                                     |
| 47        | PE=1 SV=1                                                     | 42          | apoptosis                           |
| P079      | Heat shock protein HSP 90-alpha OS=Homo sapiens OX=9606       | 10.4        |                                     |
| 00        | GN=HSP90AA1 PE=1 SV=5                                         | 3           | stress                              |
| P816      |                                                               | 10.2        |                                     |
| 05        | Dermcidin OS=Homo sapiens OX=9606 GN=DCD PE=1 SV=2            | 32          | stress, Wnt                         |
| Q5D8      |                                                               | 10.0        |                                     |
| 62        | Filaggrin-2 OS=Homo sapiens OX=9606 GN=FLG2 PE=1 SV=1         | 93          | JAK/STAT                            |
| O608      | Histone H2B type 1-K OS=Homo sapiens OX=9606                  | 9.76        |                                     |
| 14        | GN=H2BC12 PE=1 SV=3                                           | 6           | histone                             |
| P082      | Heat shock protein HSP 90-beta OS=Homo sapiens OX=9606        | 9.47        |                                     |
| 38        | GN=HSP90AB1 PE=1 SV=4                                         | 9           | stress                              |
| Q9H       | Calecyclin-binding protein OS=Homo sapiens OX=9606            | 9.29        |                                     |
| B71       | GN=CACYBP PE=1 SV=2                                           | 3           | p53, MAPK , apoptosis, Wnt          |
| P352      |                                                               | 8.87        |                                     |
| 32        | Prohibitin 1 OS=Homo sapiens OX=9606 GN=PHB1 PE=1 SV=1        | 9           | MAPK, p53, stress                   |
| P111      | Heat shock cognate 71 kDa protein OS=Homo sapiens OX=9606     | 7.81        |                                     |
| 42        | GN=HSPA8 PE=1 SV=1                                            | 5           | stress                              |
| P094      | <b>High mobility group protein B1 OS=Homo sapiens OX=9606</b> | <b>7.22</b> | <b>DNA damage repair, PI3K/AKT,</b> |
| 29        | <b>GN=HMGB1 PE=1 SV=3</b>                                     | <b>8</b>    | <b>JAK/STAT and NF-κB</b>           |
| P047      | Heat shock protein beta-1 OS=Homo sapiens OX=9606             | 7.13        |                                     |
| 92        | GN=HSPB1 PE=1 SV=2                                            | 3           | stress                              |
| P050      |                                                               | 6.56        |                                     |
| 89        | Arginase-1 OS=Homo sapiens OX=9606 GN=ARG1 PE=1 SV=2          | 3           | metabolism, immune                  |
| P245      | Elongation factor 1-beta OS=Homo sapiens OX=9606              | 6.53        | translation, metabolism, stress     |

|      |                                                                                              |      |                                          |
|------|----------------------------------------------------------------------------------------------|------|------------------------------------------|
| 34   | GN=EEF1B2 PE=1 SV=3                                                                          | 8    |                                          |
| Q9U  | Mitochondrial dicarboxylate carrier OS=Homo sapiens OX=9606                                  |      |                                          |
| BX3  | GN=SLC25A10 PE=1 SV=2                                                                        | 6.52 | metabolism, ferroptosis, apoptosis       |
| P840 | 60S ribosomal protein L19 OS=Homo sapiens OX=9606                                            | 6.46 |                                          |
| 98   | GN=RPL19 PE=1 SV=1                                                                           | 2    | stress                                   |
| P699 | Hemoglobin subunit alpha OS=Homo sapiens OX=9606                                             | 6.33 |                                          |
| 05   | GN=HBA2 PE=1 SV=2                                                                            | 9    | stress, metabolism                       |
| P110 | Endoplasmic reticulum chaperone BiP OS=Homo sapiens                                          | 5.01 |                                          |
| 21   | OX=9606 GN=HSPA5 PE=1 SV=2                                                                   | 4    | stress                                   |
| P181 | 60S ribosomal protein L7 OS=Homo sapiens OX=9606                                             | 4.87 |                                          |
| 24   | GN=RPL7 PE=1 SV=1                                                                            | 8    | stress, ferroptosis                      |
| Q085 | Desmocollin-1 OS=Homo sapiens OX=9606 GN=DSC1 PE=1 SV=2                                      | 4.87 |                                          |
| 54   |                                                                                              | 4    | $\beta$ -catenin, autophagy, metabolism  |
| P257 | Proteasome subunit alpha type-3 OS=Homo sapiens OX=9606                                      | 4.84 |                                          |
| 88   | GN=PSMA3 PE=1 SV=2                                                                           | 9    | stress, metabolism, AMPK                 |
| P007 | Coagulation factor X OS=Homo sapiens OX=9606 GN=F10 PE=1 SV=2                                | 4.59 |                                          |
| 42   |                                                                                              | 4    | immune, PAR-1-dependent signaling        |
| Q9Y5 | Signal recognition particle receptor subunit beta OS=Homo sapiens OX=9606 GN=SRPRB PE=1 SV=3 | 4.54 |                                          |
| M8   |                                                                                              | 5    | NF- $\kappa$ B, stress                   |
| Q151 |                                                                                              | 4.03 |                                          |
| 49   | Plectin OS=Homo sapiens OX=9606 GN=PLEC PE=1 SV=3                                            | 9    | MAPK/ERK, apoptosis                      |
| Q8W  | MIT domain-containing protein 1 OS=Homo sapiens OX=9606                                      |      |                                          |
| V92  | GN=MITD1 PE=1 SV=1                                                                           | 3.98 | cell fate, AKT, ERK                      |
| P051 | ADP/ATP translocase 2 OS=Homo sapiens OX=9606                                                | 3.68 |                                          |
| 41   | GN=SLC25A5 PE=1 SV=7                                                                         | 6    | PI3K/AKT, ERK                            |
| P155 | NAD(P)H dehydrogenase [quinone] 1 OS=Homo sapiens                                            | 3.61 |                                          |
| 59   | OX=9606 GN=NQO1 PE=1 SV=1                                                                    | 9    | stress, metabolism, p53, PI3K/AKT        |
| Q9N  | Calmodulin-like protein 5 OS=Homo sapiens OX=9606                                            | 3.55 |                                          |
| ZT1  | GN=CALML5 PE=1 SV=2                                                                          | 6    | epidermal differentiation                |
| P213 |                                                                                              | 3.48 | development, DNA damage repair,          |
| 33   | Filamin-A OS=Homo sapiens OX=9606 GN=FLNA PE=1 SV=4                                          | 3    | Wnt/ $\beta$ -catenin                    |
| P122 | ADP/ATP translocase 3 OS=Homo sapiens OX=9606                                                | 3.47 |                                          |
| 36   | GN=SLC25A6 PE=1 SV=4                                                                         | 8    | development, metabolism                  |
| Q9H0 | Magnesium transporter protein 1 OS=Homo sapiens OX=9606                                      | 3.39 | MAPK, cell cycle, Wnt/ $\beta$ -catenin, |
| U3   | GN=MAGT1 PE=1 SV=1                                                                           | 6    | development                              |
| P301 | Protein disulfide-isomerase A3 OS=Homo sapiens OX=9606                                       |      | metabolism, DNA damage repair,           |
| 01   | GN=PDIA3 PE=1 SV=4                                                                           | 3.37 | stress                                   |
| P007 | Coagulation factor IX OS=Homo sapiens OX=9606 GN=F9 PE=1 SV=2                                | 3.35 |                                          |
| 40   |                                                                                              | 1    | chemoresistance, senescence, immune      |
| Q9Y5 | Cytosolic Fe-S cluster assembly factor NUBP2 OS=Homo sapiens OX=9606 GN=NUBP2 PE=1 SV=1      | 3.30 |                                          |
| Y2   |                                                                                              | 4    | cell fate                                |
| P386 | Stress-70 protein, mitochondrial OS=Homo sapiens OX=9606                                     | 3.21 |                                          |
| 46   | GN=HSPA9 PE=1 SV=2                                                                           | 2    | stress, cell proliferation, p53          |
| P064 | Prothymosin alpha OS=Homo sapiens OX=9606 GN=PTMA PE=1 SV=2                                  | 3.14 |                                          |
| 54   |                                                                                              | 2    | apoptosis, stress, necrosis              |
| Q6U  |                                                                                              |      | Wnt/ $\beta$ -catenin, MEK/ERK,          |
| WP8  | Suprabasin OS=Homo sapiens OX=9606 GN=SBSN PE=1 SV=2                                         | 3.12 | chemoresistance                          |
| P381 | Electron transfer flavoprotein subunit beta OS=Homo sapiens                                  | 3.04 |                                          |
| 17   | OX=9606 GN=ETFB PE=1 SV=3                                                                    | 8    | metabolism, TGF- $\beta$                 |
